# Supplementary material for: 25(OH)D Is Effective to Repress Human Cholangiocarcinoma Cell Growth through the Conversion of 25(OH)D to 1α,25(OH)2D3
Source: MDPI journal article supplement (doi:10.3390/ijms17081326), 2016-08-12
Supplement: s1 [file s1]

## Supplementary Materials: 25(OH)D Is Effective to Repress Human Cholangiocarcinoma Cell Growth through the Conversion of 25(OH)D to $1\alpha,25(\text{OH})_2\text{D}_3$

Kun-Chun Chiang, Chun-Nan Yeh, Cheng-Cheng Huang, Ta-Sen Yeh, Jong-Hwei S. Pang, Jun-Te Hsu, Li-Wei Chen, Sheng-Fong Kuo, Atsushi Kittaka, Tai C. Chen and Horng-Heng Juang

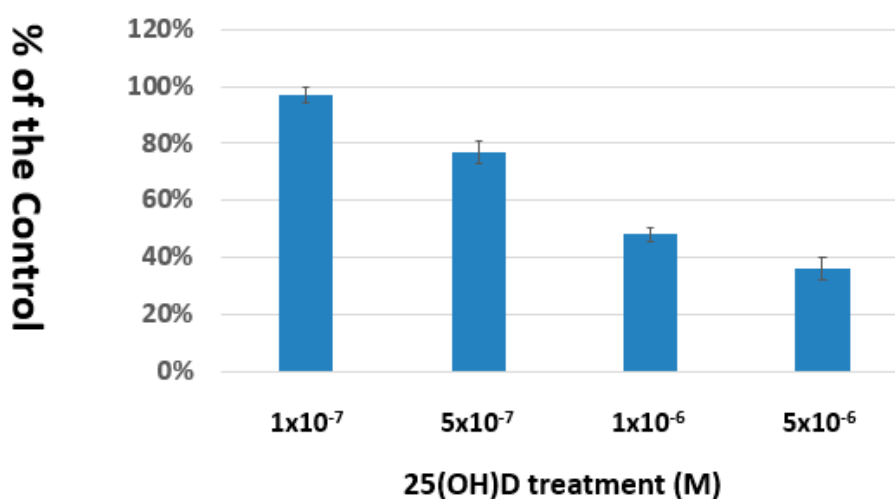

**Figure S1.** The effect of 25(OH)D on SNU308 cell growth was evaluated by CyQUANT proliferation assay kit. As shown in Figure 1,  $1 \times 10^{-7}$ ,  $5 \times 10^{-7}$ ,  $1 \times 10^{-6}$ , and  $5 \times 10^{-6}$  M 25(OH)D treatments (7 days) suppressed SNU1079 308 cell growth to 97% ± 3%, 77% ± 4%, 48% ± 3%, and 36% ± 4% of the control, respectively.
